# Supplementary material for: Infrared analysis of hair dyeing and bleaching history
Source: Royal Society of Chemistry journal article supplement (doi:10.1039/d0ay01068e), 2020-01-01
Supplement: d0ay01068e1.pdf [file d0ay01068e1.pdf]

## Infrared Analysis of Hair Dyeing and Bleaching History

Fernando Contreras, Alexei Ermolenkov and Dmitry Kurouski\*

### Supporting Information

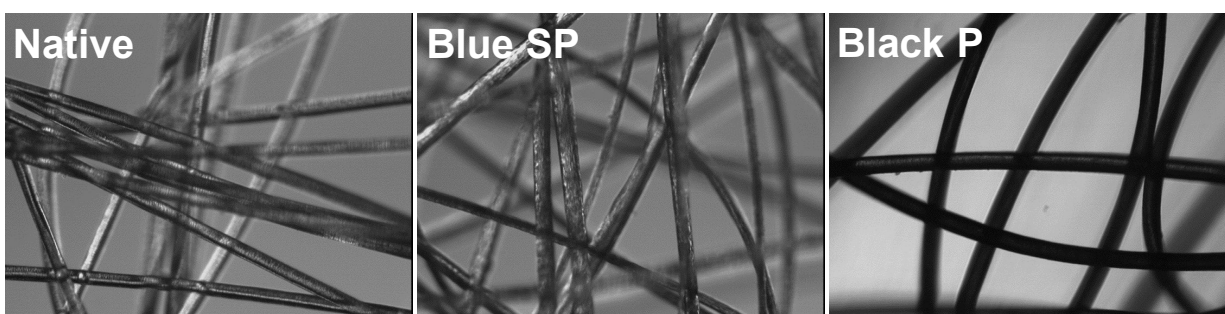

Figure S1. Microphotographs of undyed (native) hair; hair colored by blue semi-permanent colorant (Blue SP) and black permanent colorant (Black P). Microphotographs were taken on Nikon TE-2000U inverted microscope equipped by 5X objective using UNIQ Vision CCD (UNIQ Vision, Inc., Santa Clara, CA).

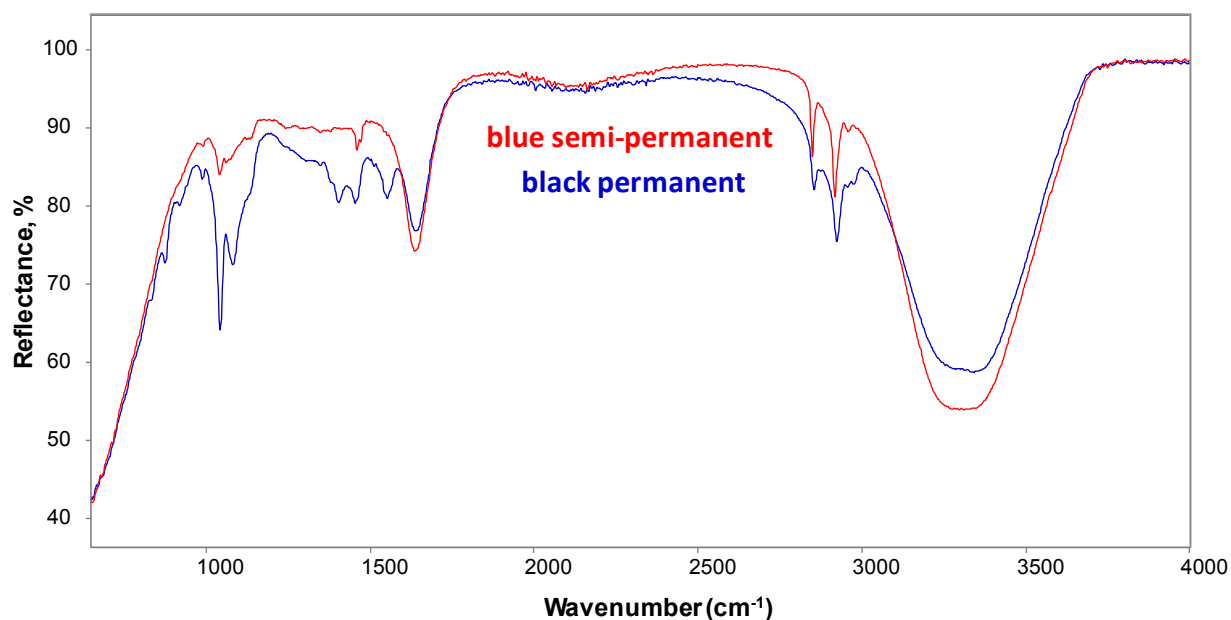

Figure S2. FTIR spectra of blue semi-permanent and black permanent colorants used in our work.
